# Supplementary material for: Memories of traditional&nbsp;rice cultivation by descendants of Indian contract laborers in Suriname
Source: Research Square preprint supplement (doi:10.21203/rs.3.rs-119658/v1), 2020-12-08
Supplement: Supplementary file 1 [file 2a60189c405a703a383ea94e.xlsx]

## Sheet: Sheet1
Memories of traditional rice cultivation by descendants of Indian contract laborers in Suriname.
Supplementary Table 1. Historic rice varieties retrieved from literature and herbarium collections, mentioned as cultivated by East Indian contract laborers and small-scale farmers in Guyana and Suriname in the period 1863-present. All rice varieties belong to Oryza sativa L.
Name (language)	Meaning of name	Country	Origin	Time period*	Botanical collection (instute, number, country, date)	References	Charecteristics (from literature)	Nr. respondents who remembers this variety (n=30)	Current cultivation location in Suriname (according to participants)	Former cultivation locations (according to participants)
Anaki tapoen (Sranantongo); Bagerie, Patarka dhân (Sarnami),	Hits the pot cover during boiling; Bagerie?; slender rice	Suriname	India	1907	Germplasm seeds ‘Bageri’ (IRRI Philippines, IRGC 16193, Nepal, 1972). Germplasm seeds ‘Lal Bageri’ (IRRI Philippines, IRGC 74573, 74574, India, 1984).	Boonacker and Drost (1907)	elongate, thin seeds, dark grey husk, can thrive with less water, inferior quality	-	-
Blue Rose (English)	Blue probably refers to anthocyans	Guyana, Suriname	USA	1928-1963	Seeds (Naturalis, L.211086, L.0991902, L.0991898, Suriname, 1932). Germplasm seeds (USDA National Plant Germplasm System, PI 388496, USA, 1974).	Codd and Peterkin (1933); Stahel (1933), Ostendorf (1962)	imported to Suriname from USA in 1933	5	-	Nickerie
Boeloe poetih (Javanese)	White rice	Suriname	Buitenzorg botanical garden, Java, Indonesia	1911-1938	Seeds (Naturalis, L.0991911, Suriname, 1927) (Naturalis, L.0991898, L.0991899, L.0991902, Suriname, 1932). Germplasm seeds (IRRI Philippines, IRGC 17351, Indonesia, 1972)	Drent (1911); Brandon (1933)	no information given	-	-
Bruin Missie (Sranantongo)	Brown (dark-skinned) woman	Suriname	Para river, Suriname	1907-1932	Seeds (Naturalis, L.0991903, L.0991897, Suriname, 1932) . Germplasm seeds (IRRI Philippines, IRGC 2116, IRGC 1938, IRGC 2145, Suriname?, 1962).	Stahel (1933)	4 month upland landrace, grown by Maroons and Creoles (?) in the 1930s. Sent in 1907 to the US, became the parent stock of new US cultivars like Gulfrose.	2	-	Nickerie
Demarara (Creole) No. 79; Damra (English)	After Demarara river, Guyana	Guyana, Suriname	Berbice river, Guyana	1904-1932	Seeds (Naturalis, L.2110084, L.0991896, Suriname, 1932). Germplasm seeds (IRRI Philippines, IRGC 14563, Guyana, 1971)	Boonacker and Drost (1907); Boonacker (1933); Codd and Peterkin (1933)	Demerara Creole was a landrace from the Berbice, selected for further breeding by Experimental Station Guyana and and Landbouwproefstation Paramaribo	10	Cultivated by Hindostani farmers, but location unknown	Saramacca (Peperhol 183 and Doekieweg)
Fini tere (Sranantongo)	Fine tail (thin awn)	Suriname	India	1871-1963	-	Boonacker and Drost (1907); Ostendorf (1962)	thin, elongate sees, short awns, rare landrace, average quality	-	-
Garika Suama Vari (Sarnami)	meaning?	Guyana	India	1928	-	Codd and Peterkin (1933)	good yield, 4 months, very small grains, non commercial	-	-
Kristna Kata Kulu (Sarnami)	Krishna ritual from Kullu?	Guyana	India	1928-1933	-	Codd and Peterkin (1933)	5 month variety with anthocyan, very small and short broad seed. Important in Guyana in the 1903s.	-	-
Mutmuria ‘moetmoeria’ (Sarnami); moetka dhân (Sarnami); mooi missie (Sranantongo)	Village in northern India (Bihar); thick rice; beautiful woman	Suriname	India	1907-1938	Germplasm seeds ‘Mutmuria’ (IRRI Philippines, IRGC 6717, origin? 1962). Germplasm seeds ‘Moetmoerio’ (USDA, nr. 38364, Suriname, 1914). Germplasm seeds ‘Mboto Molia’ (US National Plant Germplasm System, Q 40540, Suriname (Saramaccan Maroons), 1999. Germplasm seeds (SNRI/ADRON ; IZC-2104; IZC-2276, IZC-2161, Suriname, 1998).	Boonacker and Drost (1907); Stahel (1933); Anonymous (1938); Baumgart et al. (1998)	Not clear whether current Maroon and historic East Indian landraces are the same. Round, thick seed (4 x 7-8 mm). Good quality, not planted in large quantities.	4	Saramacca	Commewijne (Welbedacht, De Hulp, Orleanakreek)
Padi Nickerie, varieteit Wageningen select (Dutch)	Nickerie variety, Wageningen selection	Suriname	Developed in Nickerie, Suriname	1954-1958	Seeds (Naturalis, L.0992015, Suriname, 1958). Germplasm seeds ‘Nickerie’ (IRRI Philippines, IRGC 10780, Suriname, 1967)	De Wit (1960)		5	-	Nickerie, Macreabo (km 54)
Padi Tjina, Bamboesie (Sranantongo)	Chinese rice, bamboo	Suriname	imported in 1929 from Java, Indonesia	1927-1932	Seeds (Naturalis, L.2110090, L.0991908, Suriname, 1932). Germplasm seeds ‘Tjina 334’ (IRRI Philippines, IRGC 4206, Indonesia, 1962)	Stahel (1933); Anonymous (1938)	replaced skrivimankoti, boeloe poetih, kretek, serong, ketan. Lodged easily, so dissappeared after mechanization, long growth season.	5	-	Nickerie, Commewijne ( Orleanakreek, Toevlucht)
Ramcajara (Sarnami)	Blue stick?	Essequibo, Guyana	India	1933	Germplasm seeds (IRRI Philippines, IRGC 5888, Fiji, 1963)	Codd and Peterkin (1933);	blue anthocyans,, growth season 4,75 month	-	-
Rexoro, Rexora (English); Bergi Lexora (Sranantongo), Sola,(Aucan, Saramaccan).	meaning?	Suriname, Guyana	USA	1933-2017	Seeds (Naturalis, TVA 6764, 6775, Suriname, 2017)** US National Germplasm (PI 297556, GSOR 310256, Mozambique, 1964). Germplasm seeds (SNRI/ADRON, IZC-1269, Suriname, 1949-1954)	Stahel (1932); De Wit (1960); van Andel et al (2019)	dryland cultivar, imported from the US. Sent to the interior of Suriname in ca. 1936.	16	Only by Maroons: Jawjaw (Suriname river), Marowijne and Lawa rivers	Nickerie (Kwarantijnpolder, Nanipolder, Krappapolder), Saramacca, Wanica (Welgedacht C Weg), Commewijne (De Hulp & Welbedacht, Orleanakreek, Toevlucht)
Skrifimankoti (Sranantongo), Patarka dhân (Sarnami), Djerehi (Sarnami)	Supervisor’s jacket; slender (thin) rice.	Suriname	India	1890-1954	Seeds Skrifimankoti (Naturalis, L.2110089, Suriname, 1932). Dehusked seeds Skrifimankoti (Naturalis, L.0991907, Suriname, 1932). Germplasm seeds Patarka (IRRI Philippines, IRGC 6709; 9774, India? 1962, 1964); SNRI/ADRON IZC-2048	Stahel (1933); De Wit (1960); Boonacker (1933)	Probably the same landrace as Patarka dhân and Djerehi (Stahel, 1933). Used to breed other varieties. Weak straw and shattering panicles. But very well performing (Stahel, 1932)	Skrifimankoti (12), Patarka dhân (10)	-	Commewijne (Orleanakreek, Toevlucht, Kronenburg, Goede Vriendschap), Nickerie (Kwarantijnpolder, Nanipolder)
Witte Wanica (Dutch)	Named after Wanica district near Paramaribo, where large rice fields existed in the past	Suriname	Para district, Suriname	1906, 1933-?	Seeds (Naturalis, L.2110082, Suriname, 1932). Germplasm seeds ‘Wanica’ (IRRI Philippines, IRGC 3394, Suriname, 1962).	Stahel (1933); Brandon (1933). Ostendorf (1962)	4 month upland landrace, grown by Maroons and Creoles (?)	4	-
Sutra dhân (Sarnami)	meaning?	Guyana	India?	1906	Germplasm seeds ‘Sutra’ (IRRI Philippines, IRGC 82595, IRGC 60479, Malaysia, 1991)	Codd & Peterkin (1933)	Seta Patna type, curved, dark golden brown, pigmentation in leaves	-	-
* Time period documented in written sources or on collection vouchers. The real time period in which this rice was grown was probably longer
** These 2017 collections represent the Maroon variety “Alekisola, weti wan”, which may refer to “white Rexora”, but it still needs to be confirmed by DNA analysis that these descend from the US Rexora variety from the 1930s.
