# Supplementary material for: Memories of traditional&nbsp;rice cultivation by descendants of Indian contract laborers in Suriname
Source: Research Square preprint supplement (doi:10.21203/rs.3.rs-119658/v1), 2020-12-08
Supplement: Supplementary file 2 [file 9e7d9a5611ad1dfae64fdf82.xlsx]

## Sheet: tab 1
Memories of traditional rice cultivation by descendants of Indian contract laborers in Suriname.
Supplementary Table 3. Rice varieties (modern and historic) mentioned during interviews, current and past growing location, agricultural and culinary characteristics, and presence in herbarium or germplasm collections.
Rice variety	Etymology	Coll. nr. *	Nr. participants who heard of it	Currently grown? (nr. of participants)	Current cultivation location	Cultivated in the past? (nr. participants)	Former cultivation location	Origin of variety*	Description seeds	Description plant	Positive traits	Negative traits	Uses (mentioned by farmers)	Existing collections with this name	Collection date
101	modern cultivar name		1	No (1)	-	Yes (1)	Nickerie	SNRI/ADRON (c. 2000), abandoned in 2002	Like Iloni (normal grain)
102	modern cultivar name		1	No (1)	-	Yes (1)	Nickerie	SNRI/ADRON (2001)	Like Iloni (normal grain)
110, D110	takes 110 days untill harvest		3	No (3)	-	Yes (3)	Nickerie (Krappapolder, Henaerpolder, Groot Henaerpolder)	SNRI/ADRON (c. 2000), abandoned in 2002	Short / long? grain, flat grain	Thick, yellowish, long plant. Looked same as "Long rice". Takes 110 days untill harvest	Heavy padi, nice taste		Consumption
125, ADRON 125	takes 125 days to harvest		2	Yes (2)	Nickerie	Yes (1)	Nickerie	SNRI/ADRON (2004)				Easily fungi-infected	Consumption, sale
130, elita ADRON-130	modern cultivar name		1	Yes (1)	Nickerie	No	-	SNRI/ADRON (2008)					Consumption, sale
134	modern cultivar name		1	Yes (1)	Nickerie	No	-	SNRI/ADRON					Consumption, sale
81B	cultivar name		1	No (1)	-	Yes (1)	Saramacca	SML 81b Magali (1958)		Tall plant (1.5 m high)	Good padi, high yield, high nutritional value, no diseases, so pesticides needed, soft when cooked	Lodging when windy, low yield when wheather is bad or short season	Consumption
Alupi (Alubi)	cultivar name		3	No (3)	-	Yes (1)	Nickerie	SML242 (1960)			Good cooking quality
Apikalo	cultivar name		1	No (1)	-	Yes (1)	Nickerie	SML140/10 (1959)
Barbaman	beard man', after long awns		1	No (1)	-	Yes (3)	Commewijne (Orleanakreek, Toevlucht)	probably a landrace	Long grain, awn	Yellowish plant		Lodging when not harvested on time
Blue Bonnett	blue probably after anthocyans		1	No (1)	-	Yes (1)	Nickerie	US (before 1954)
Camponi	modern cultivar name		2	No (2)	-	Yes (1)	Nickerie	SML70127-6 (1974)	Short grain, upland rice?			Bad cooking quality, stays hard after cooking	Consumption	SNRI/ADRON IZC-1297
Champochino (Chempochino)	cultivar name		4	No (4)	-	Yes (4)	Commewijne (De Hulp, Orleanakreek, Toevlucht)	?	Long, thick grain	Yellowish, tall plant, 1.5 m high, big panicles, 6 months growth season	High yield, soft when cooked	Lodging when not harvested on time	Consumption
DDB2	modern cultivar After former president Desire Delano Bouterse	MMR5	2	Yes (2)	Saramacca, Wajong 107	No (2)	-	SNRI/ADRON (2017)	Long grain, light glabrous husk	Short plant		Lodges easily, weak stem, variable quality easily bastardized, high costs, low profit, susceptible to diseases	Consumption, sale
Dima	cultivar, after first two letters of 'Van Dijk and Mastenbroek'	MMR18A, MMR18B, MMR19	17	Yes (2)	Marowijne (km 58), Wageningen	Yes (14), No (3)	Saramacca, Houttuin (Javanikalaan 8). Nickerie (Kwarantijnpolder, Nanipolder, Krappapolder, Groot Henearpolder). Commewijne (Welbedacht), De Hulp, Orleanakreek	VD 5096-25 (1953)	Long, thin / thick? seeds	Thinner, short plant, knee-height, darker green than long rice, needs wet soil	Good cooking quality, sweet and softer when cooked than 110	Grains fall off easily when ripe: loss of harvest	Consumption	SNRI/ADRON IZC-516
Diwani	modern cultivar name		4	No (4)	-	Yes (4)	Nickerie	SML 68101-10 (1976)	Long grain, 120 days to harvest		High harvest, good cooking quality, very nice taste		Consumption	SNRI/ADRON IZC-1657
Doedjie (Doerdjie)	?		1	No (1)	-	Yes (1)	Nickerie (Henaerpolder)	?	Very short rice, many grains, light brown		Very good padi, thick bundles. Father let family taste it.		Consumption
Early Pacific	probably Early Prolific?		3	No (3)	-	Yes, by Javanese (1)	Nickerie	US (1928)	Light brown. Looks like Doerdjie					Naturalis L.0991904; L.0991894; L.0991895; L.2110085	Guyana (1928), Suriname (1932)
Eloni (Iloni)	cultivar name, after Edou Lickosen from Nickerie		6	Maybe (1), No (5)	Unknown	Yes (4)	Saramacca, Nickerie	SML 70135-1 (1979), abandoned c. 2000	Long grain like Basmati rice	Short growth season, short plant, high production	Good cooking quality; cultivated for a long time, replaced Skrifimankoti	Low resistancy to diseases	Consumption	ADRON?
Ferrini (Firini)	cultivar name		3	No (3)	-	Yes (3)	Nickerie	SML 81056-2 (1990) abandoned c. 2000
Groveni (Grofini, Grovini)	cultivar name, after former president Venetiaan		5	No (1)	-	Yes (5)	Nickerie, Saramacca	SML 84011-1 (1994), abandoned c. 2000	Long grain	Dark green plant	Good cook-quality		Consumption
Holland (Hollandia, Hollandse padi)	cultivar name		5	No (5)	-	Yes (5)	Commewijne (Welbedacht, De Hulp, Orleanakreek, Toevlucht)	SML (1963)	Short and thick grains, there were two varieties: one short yellowish plant with small grains; one big plantwith long, yellowish grains	5 months growth season, needs to be planted on lower ground	Good harvest, high cooking quality, mostly planted in new fields, nice taste, soft and shiny when cooked	Hard to peel, lodging when not harvested on time	Consumption	SNRI/ADRON IZC-2020
Inidia	cultivar obtained from INI-DIA BV (large rice company in Nickerie		1	No (1)	-	Yes (1)	Nickerie (Krappapolder)	Ini-dia is a large rice producer in Suriname, cultivar unknown
Karani	?		1	No (1)	-	Yes (1)	Nickerie	?	Long grain
Ketang / Ketan	sticky rice (Javanese)		4	No (4)	-	Yes (3), by Javanese (1)	Saramacca, Nickerie	landrace of Javanese origin (1904)	Dark red grains	Tall plant (1.5 m)	Good padi, high yield, nutritious, no diseases, soft when cooked, different taste than other rice	Lodging easily when windy, low yield when wheather was bad or season was short	Consumption	USDA (Nr 38363)	Suriname (1914)
Ketang irang / ketan ireng	black sticky rice (Javanese)		4	No (4)	-	Yes (2), by Javanese (1), by people from Zorgvliet (1)	Commewijne (Orleanakreek, Toevlucht, Zorgvliet)	landrace of Javanese origin (1904)	Black and thick grain, short or long (?)		Sticky when cooked	Hard to tresh, so not planted a lot, needed to be milled by hand; lodging when not harvested on time	Consumption, given to Javanese women to make sweet sticky dishes	Naturalis L.1292991	Suriname (2012)
Ketang poeti / ketan putih	white sticky rice (Javanese)		1	No (1)	-		-	landrace of Javanese origin (1928)	White, long		Sticky when cooked		Consumption, given to Javanese women to make sweet sticky dishes	Naturalis L.0930649; L.0991911; L.0930649	Suriname (1928)
Ketang serang	sticky rice (Javanese)		3	No (3)	-	Yes, by Javanese only	Commewijne (Orleanakreek, Toevlucht, Zorgvliet)	landrace of Javanese origin (1933)	Long white grain		Sticky when cooked	Hard to tresh, so not planted a lot, lodging when not harvested on time	Consumption, given to Javanese women to make sweet sticky dishes
Kretek	?		2	No (2)	-	Yes (2), by Hindustani (1)	Commewijne (Orleanakreek, Toevlucht)	Javanese landrace (1932)	Very short grain	Yellowish plant		Lodging when not harvested on time, hard when cooked	Consumption	Naturalis L.2110083; L.0991906; L.0991687	Suriname (1932)
Lalya	red rice (Sarnami)		2	No (2)	-	Yes, but undesired weed	Nickerie (Krappapolder)	weedy rice	Not many seeds, red grains	Taller than other rice types, easily lodging		Detrimental, gives little food, lodges, takes other plants down, grooves in seeds, still has red stripes after poilishing	Hardly used for cooking, chicken feed
Long rice	general name		4	No (4)	-	Yes (4)	Nickerie (Henaerpolder, Groot Henaerpolder), Commewijne (Orleanakreek, Toevlucht)	?	Long grain	Thick, yellowish, tall plant (1,5 m). Similar to 110, but took 120/125 days to ripen	Nice taste	Lodged when not harvested in time or strongwinds	Consumption
M2	said to be a Chinese variety		1	No (1)	-	Yes	Nickerie	SML (before 1994)
Mangelras	probably a cultivar from Manglie BV		2	No (2)	-	Yes	Nickerie	Manglie NV is a large commercial rice company in Suriname	Long grain		Very good variety		Consumption
Moeng-rijst	after Moengo?		1	No (1)	-	Yes	Commewijne (De Hulp_	upland Maroon landrace		No water needed (highland rice), 6 months growth season			Animal fodder
Mursila	?		1	No (1)	-	Yes	Commewijne (Orleanakreek)	?	Thick grain	Harvested by hands with ani-ani, big panicles like Champochino, high yield			Consumption
Nickerie padi dierenvoer	animal feed rice from Nickerie	MMR2; MMR3; MMR4; MMR8, MMR9B	3	Yes (1)	Saramacca			SML 1954 ('Nickerie')	Very variable seeds, mixed with weedy red rice				Animal fodder
Padi oeloe	worm rice, after long awns		1	No (1)	-	Yes, by Javanese only	-	Javanese landrace	Awn, bit thicker grain; looks like 'Ketang irang' with awn				Consumption
Paloma	cultivar from large rice company in Suriname		1	No (1)	-	Yes	Nickerie (Krappapolder)	Paloma is a large rice company in Suriname					Consumption
Patang	four (Malay), after 4-month growth season?		1	Yes (1)	Meerzorg, Kwarasang (Javanese farmers)	Yes	-	probably a Javanese landrace					Consumption, given to Javanese women to make sweet sticky dishes
Raymoen (Ramoen / Ramona )	?	MMR6	7	Yes (1), No (6)	Saramacca, Wajong 107	Yes (5)	Saramacca, Commewijne (De Hulp, Kronenburg, Goede Vriendschap), Nickerie	probably a Javanese landrace	Short thick grain, variable 'bastard' rice	Height 1.5m, many seeds	Good padi, nutritious, high yield (others say low yield), no diseases, no pesticide needed, soft when cooked	Lodging easily when windy, low yield when wheather is bad or short season; hard to peel	Consumption, animal fodder
Seichan	Chinese rice?		1	No (1)	-	Yes	Nickerie	?
Shifoni(a)	?		1	No (1)	-	Yes, before mechanical agriculture (1)	-	?
SML	after SML		2	No (2)	-	Yes (2)	Commewijne (Kronenburg, Goede Vriendschap)	general name for SML cultivars	Long grain, looks like Holland, but a bit thicker	Shorter harvest time than Raymoen and Patarka, very nice taste, soft	Did not lodge		Consumption
V6	said to be a Chinese cultivar name		1	No (1)	-	Yes	Nickerie	?
MAROON rices
Alekisola	probably after 'Rexoro'	MMR25	4	Yes (4)	JawJaw	Yes	JawJaw	US cultivar (1932)	Thin grain, high yield				Consumption
Birgie Lexora	upland Rexora		1	Yes (1)	-	Yes	"in the highlands" (interior)	US cultivar (1932)	4-5 monthsgrowth season				Consumption
Blauw ana aleisi	blue hand rice, after anthocyans	MMR12	1	Yes (1)	Macreabo, km 54	Yes, by her Maroon grandparents	Sipaliwini	Maroon landrace, from grandparents in Sipaliwini district	Red husk, glabrous, short grain, brown apex	Upland rice, blue anthocyan in plant	Harvested two times (from fallen grains of previous harvest), sometimes even three times		Consumption
Creoro rijst	Creole rice		1	-	-		-	landrace?						Naturalis L.0930659; L.0930650	Suriname (1905, 1928)
Koelie aleisi (hairy)	Hindustani rice	MMR31	1	Yes (1)	JawJaw	Yes (1)	JawJaw	unknown wetland variety obtained from Hindustani	Hairy husk				Consumption	SNRI/ADRON IZC-2261 ('Koelie alesie')
Koelie aleisi (red)	Hindustani rice	MMR30	5	Yes (1)	JawJaw	Yes (1)	JawJaw	unknown wetland variety obtained from Hindustani	Red glabrous husk, white grain.		"Beautiful rice"		Consumption	SNRI/ADRON IZC-2164 ('Lebi koeli')
Koelie aleisi (white)	Hindustani rice	MMR29	5	Yes (1)	JawJaw	Yes (1)	JawJaw	unknown wetland variety obtained from Hindustani	Pale, glabrous husk, white grain		"Beautiful rice"		Consumption
Massa/Masra aleisi	master rice (after Hindostani?)		3	No (3)	-	Yes(2), by Hindustani people (1)	Marowijne, km 57,5	unknown wetland variety obtained from Hindustani					Consumption	Naturalis L.3928213	Suriname (2016)
Mestie	schoolteacher's rice		1	Yes (1)	-	Yes (1)	Marowijne, km 57,5	probably upland cultivar, similar to rexora					Consumption	SNRI/ADRON IZC-2251 ('Mesti')
Pendi	spotted rice		1	No (1)	-	-	-	Maroon landrace					Consumption
Rexora (Lexora)	probably after 'Rexoro'		16	Yes (3)		Yes (14)	Nickerie (Kwarantijnpolder, Nanipolder, Krappapolder), Saramacca, Wanica (Welgedacht C Weg), Commewijne (De Hulp, Welbedacht, Orleanakreek, Toevlucht)	US cultivar (1932)	Long thin grain, brownish/red husk, "thinner than Holland"	Brownish, tall plant, 1.5 m high, dryland variety, harvested after 4 months with ani ani, long growth season	Good padi, high yield, nutritious, no diseases so no pesticide needed, soft when cooked.		Consumption	SNRI/ADRON IZC-1269 ('Rexora-Koeli Alesi)
Sika-asiri (rood)	chigger seed (red variety)	MMR17	1	Yes (1)	Marowijne, km 60	Yes (1)	-	Maroon landrace	Red husk	Upland variety			Consumption
Sika-asiri (Sikasi)	chigger seed (red variety)		1	Yes (1)	-	-	-	Maroon landrace					Consumption
Sika-asiri (wit)	chigger seed (white variety)	MMR16A, MMR16B, MMR16C	1	Yes (1)	Marowijne, km 61	Yes (1)	-	Maroon landrace	Red husk	Upland variety			Consumption
Sola	probably after 'Rexoro'		1	Yes (1)	Marowijne, km 57	Yes (1)	-	Maroon landrace		Needs to be planted on lower ground			Consumption
Sola rood	Rexora (red variety)	MMR10, MMR13, MMR14A-F	1	Yes (1)	Macreabo, km 54	Yes (1)	Sipaliwini	Maroon landrace, from grandparents in Sipaliwini district	Red husk, upland variety		Harvested two times (from fallen grains of previous harvest), sometimes even three times		Consumption
Sola wit	Rexora (white variety)	MMR11A, MMR11B, MMR15A	1	Yes (1)	Macreabo, km 54	Yes (1)	Sipaliwini	Maroon landrace, from grandparents in Sipaliwini district	Pale, glabrous husk, long white grainwithout distinctive apex, mixed with short grain with black apex.	Upland variety	Harvested two times (from fallen grains of previous harvest), sometimes even three times		Consumption	SNRI/ADRON IZC-2243
Wat(r)alanti	water land, needs swampy soil	MMR34	3	Yes (1)	JawJaw	Yes (1)	Nickerie	unknown wetland variety obtained from Hindustani	Long, thin grain, light husk, black apex	Tall plant, very thick stem. Inflorescence is very tall (30cm) with a lot of seeds per panicle	High harvest per plant, easy to peel, very good taste	Longer growth season than average Maroon-varieties (6 instead of 4 months). Only has high hield when grown in wet swampy soil near water.	Consumption	SNRI/ADRON IZC-1359; Naturalis ( U.1509856)	Suriname 1998, 2012)
old varieties
Blue Rose	blue probably after anthocyans		5	No	-	Yes	Nickerie	US cultivar (1928)	"Looks like general Javanese rice, Ketang or Kretek, looks like cross-breading with weedy red rice					see Supplementary Table 1
Bruin Missie	brown lady		2	No	-	Yes	Nickerie	Landrace, Para river, Suriname (1907)	"Looks like Mutmuria"					see Supplementary Table 1
Demarara (Damra / Demerara / Demerara Creole)	after the Demerara river in Guyana		10	Yes (1)	Unknown	Yes (3)	Saramacca (Peperhol 183; Doekieweg)	Guyanese landrace (1904)						see Supplementary Table 1
Djerehi	?		2	No	-	Yes	-	Unknown, said to be different from Skrifimankoti	Short plant, needed to be overplanted after germinating in seed bed					see Supplementary Table 1
Mutmuria	?		4	Yes (1)	Saramacca	Yes	Commewijne (Welbedacht, De Hulp, Orleanakreek)	India (1907)	Small thick grain. Looked like Kretek, only longer and thicker	Smaller rice plant (0,5 m), small bunches, harvested by hand (ani ani and haswa)		When cooked and warm it was soft, after that it quickly became hard	Consumption, chicken feed	see Supplementary Table 1
Padi Nickerie Wageningen Select (1958)	after Wageningen village, Nickerie		5	Yes (1)	Unknown	Yes	Nickerie, Macreabo km 54	Nickerie (1954)	Longer grain, looked like Champochino					see Supplementary Table 1
Padi Tjina	rice from China (Sranantongo)		5	No	-	Yes	Nickerie; Commewijne (Orleanakreek, Toevlucht)	Java (1929)	Looked like ketang rice, Chempochino.					see Supplementary Table 1
Patarka (dhân / rijst)	thin rice (Sarnami)		10	No	-	Yes	Saramacca, Nickerie (Krappapolder), Commewijne (Welbedacht, De Hulp) Orleanakreek, Kronenburg, Goede Vriendschap, Houttuin)	Unknown, said to be different from Skrifimankoti	Long, thin grain , but shorter and thicker than Dima. Looked like Lexora, but with a whiter husk.	Tall plant (1.5m), 4 months growth season, harvested by hand with hasua	Good padi, large panicles, high yield, nutritious, no diseases so no pesticides needed, easily cultivated , soft and sweet when cooked, especially when fresh and hand peeled, then it filled the belly more	Lodging easily when windy or when ripe, as it was a longer plant. Low yield in bad wheather or short season. Grain was too thin		see Supplementary Table 1
Skrifimankoti	writer's jacket (Sranantongo)		12	No		Yes (7), much cultivated variety (1), by himself (1), by father (1)	Commewijne (Orleanakreek, Toevlucht, Kronenburg, Goede Vriendschap), Nickerie (Kwarantijnpolder, Nanipolder)	India (1890)	Long thin grain, similar to Dima	Yellowish plant, 1.5 m tall. 6 months growth season	Good rice, high yield, cultivated much, almost by everyone as it was the 'wonder race'	Lodged easily, especially when not harvested on time	Consumption	see Supplementary Table 1
Witte Wanica	after former rice-growing district Wanica		4	No	-	-	-	Landrace, Para river, Suriname (1906)	Looked like Koelie aleisi, Ketang, Hollandia, maybe just slightly thinner grain				Cattle feed	see Supplementary Table 1
* MMR = Melissa M. Ramdayal
